# Supplementary material for: The electrocatalytic activity of IrO2–Ta2O5 anode materials and electrolyzed oxidizing water preparation and sterilization effect
Source: Royal Society of Chemistry journal article supplement (doi:10.1039/c4ra14671a), 2014-12-19
Supplement: c4ra14671a1.pdf [file c4ra14671a1.pdf]

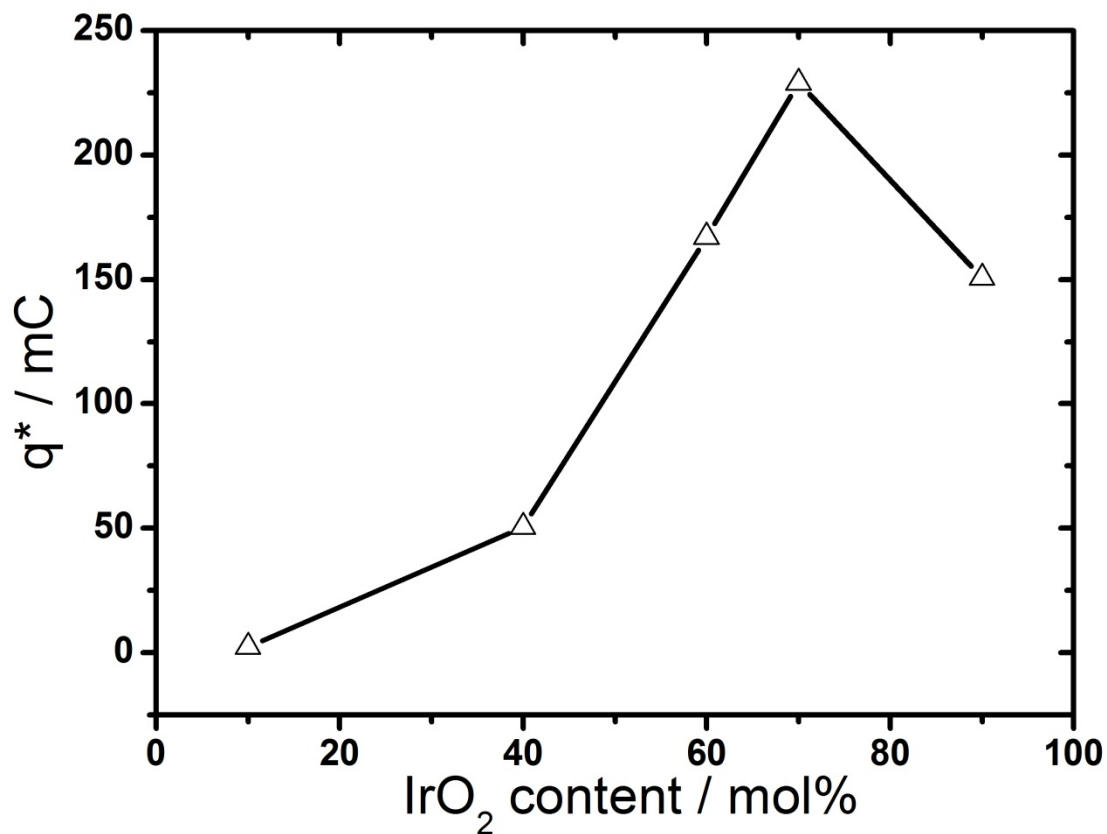

Fig.S1 Dependence of voltammetric charge  $q^*$  on the composition of Ti/ $\text{IrO}_2$ - $\text{Ta}_2\text{O}_5$  anodes tested in  $0.5\text{mol}\cdot\text{L}^{-1}$   $\text{H}_2\text{SO}_4$  solution at a sweeping rate of  $20\text{mV}\cdot\text{s}^{-1}$

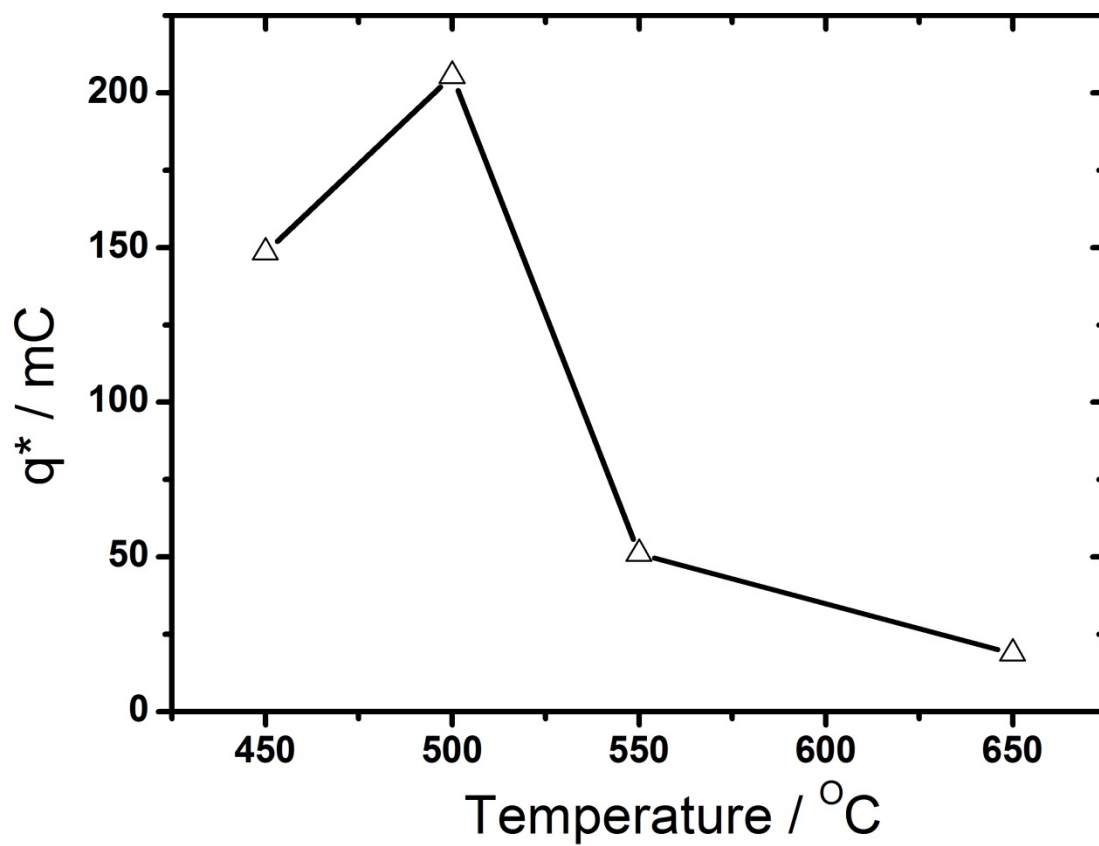

Fig.S2 Dependence of voltammetric charge  $q^*$  on the preparation temperature of Ti/IrO<sub>2</sub>-Ta<sub>2</sub>O<sub>5</sub> anodes tested in 0.5mol·L<sup>-1</sup> H<sub>2</sub>SO<sub>4</sub> solution at a sweeping rate of 20mV·s<sup>-1</sup>

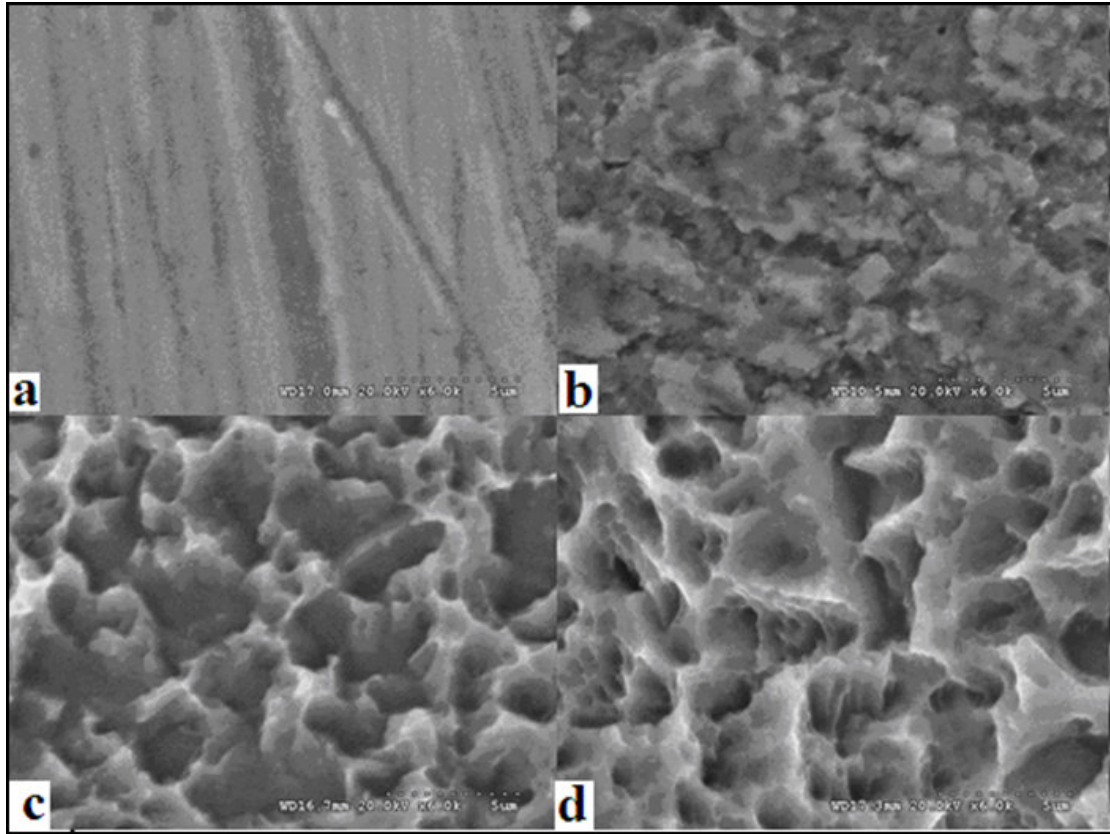

Fig.S3 SEM micrographs for Ti substrate with different activation time (a) 0min, (b) 10min, (c) 40min, (d) 60min

**Table S1** The physicochemical property of EO water prepared by different anode materials

| Anode materials                                  | Current density /mA·cm <sup>-2</sup> | Physicochemical property of EOW |        |                        |
|--------------------------------------------------|--------------------------------------|---------------------------------|--------|------------------------|
|                                                  |                                      | pH                              | ORP/mV | ACC/mg·L <sup>-1</sup> |
| Pt(electroplate)                                 | 40                                   | 2.26                            | 1096   | 4.068                  |
|                                                  | 160                                  | 2.03                            | 1118   | 10.90                  |
| IrO <sub>2</sub>                                 | 40                                   | 2.33                            | 1136   | 24.41                  |
|                                                  | 160                                  | 2.27                            | 1147   | 93.52                  |
| RuO <sub>2</sub>                                 | 40                                   | 2.39                            | 1136   | 61.70                  |
|                                                  | 160                                  | 2.45                            | 1139   | 194.4                  |
| IrO <sub>2</sub> -Ta <sub>2</sub> O <sub>5</sub> | 40                                   | 2.36                            | 1141   | 51.53                  |
|                                                  | 160                                  | 2.37                            | 1139   | 152.6                  |

Note: The electrolyte is 0.05wt% NaCl (50mL). The electrode distance is 2.0cm and the electrolysis time is 30min.

**Table S2** The analysis content of Ti/IrO<sub>2</sub>-Ta<sub>2</sub>O<sub>5</sub> with different IrO<sub>2</sub> content and preparation temperature

| No. | Nominal content of IrO <sub>2</sub> | Preparation temperature | XRF Analysis   |
|-----|-------------------------------------|-------------------------|----------------|
| 1   | 90:10                               | 500                     | 86.615: 13.385 |
| 2   | 70:30                               | 450                     | 74.438:25.562  |
| 3   | 70:30                               | 500                     | 73.026:26.974  |
| 4   | 70:30                               | 550                     | 71.389:28.611  |
| 5   | 70:30                               | 650                     | 72.782:27.218  |
| 6   | 60:40                               | 500                     | 60.323: 39.677 |
| 7   | 40:60                               | 500                     | 51.576:48.424  |
| 8   | 10:90                               | 500                     | 37.743: 62.257 |
